# Supplementary material for: Dual functional monomer surface molecularly imprinted microspheres for polysaccharide recognition in aqueous solution
Source: Royal Society of Chemistry journal article supplement (doi:10.1039/c9ay00132h), 2019-01-01
Supplement: c9ay00132h1.pdf [file c9ay00132h1.pdf]

**Electronic Supplementary Material (ESI) for Analytical Methods.**

**This journal is © The Royal Society of Chemistry 2019**

## **Supplementary Information**

**Dual functional monomers surface molecular imprinted microspheres for  
polysaccharide recognition in aqueous solution**

**Qianyu Zhao <sup>a, 1</sup>, Haitian Zhao <sup>a, 1</sup>, Weiwei Huang <sup>a, 1</sup>, Xin Yang <sup>a, \*</sup>, Lei Yao <sup>c</sup>, Jia  
Liu <sup>d, \*</sup>, Jiaqi Li <sup>a</sup> and Jing Wang <sup>b, \*</sup>**

<sup>a</sup> *Department of Chemistry and Chemical Engineering, Harbin Institute of Technology,  
Harbin 150090, China*

<sup>b</sup> *Institute of Quality Standard & Testing Technology for Agro-Product, Chinese  
Academy of Agricultural Sciences, Key Laboratory of Agri-food Safety and Quality,  
Ministry of Agriculture of China Beijing, Beijing 100081, China*

<sup>c</sup> *School of Food Science, Northeast Agricultural University, Harbin 150090, China*

<sup>d</sup> *Internal Trade Food Science and Technology Co., Ltd, Beijing 102209, China*

*\*Corresponding authors. E-mail address: yangxin@hit.edu.cn (X. Yang)*

## Preparations of mono-functional monomers MIPs

*Synthesis of spherical MIPs-APBA:* 1 mL of starch solution ( $0.77 \text{ mg mL}^{-1}$ ) and 2 mL of APBA ( $6.1 \text{ mg mL}^{-1}$ ) were added into the 50 mL centrifugal tube containing 14 mL phosphate buffer (pH 9.0). Then mixed 5 min under ultrasound and carried on pre-polymerization at room temperature with the static setting. An hour later, 30 mg of  $\text{SiO}_2@\text{COC}$  nanoparticles and 3 mL of APS ( $13.69 \text{ mg mL}^{-1}$ ) were added into the solution to initiate polymerization. After nitrogen filling, sealed centrifugal tube on vapor-bathing constant temperature vibrator under  $60^\circ\text{C}$  with the speed of  $200 \text{ r min}^{-1}$ . After 24 hours of reaction, the solution was centrifuged for 10 min at 4500 rpm. The precipitate was activated by successively with phosphate buffer (pH 5.0) and a mixture of methanol and acetic acid (9:1, v/v) for remove the template. The precipitate was dried at  $45^\circ\text{C}$  in vacuum for overnight. The synthesis method of the starch silica surface non-molecular imprinted polymers (NIPs-APBA) was the same as that of MIPs-APBA but the template molecule was not added.

*Synthesis of spherical MIPs-AMPS:* 1 mL of starch solution ( $0.77 \text{ mg mL}^{-1}$ ) and 2 mL of AMPS ( $4.15 \text{ mg mL}^{-1}$ ) were added into the 50 mL centrifugal tube containing 14 mL phosphate buffer (pH 9.0). Then mixed 5 min under ultrasound and carried on pre-polymerization at room temperature with the static setting. An hour later, 30 mg of  $\text{SiO}_2@\text{COC}$  nanoparticles and 3 mL of APS ( $13.69 \text{ mg mL}^{-1}$ ) were added into the solution to initiate polymerization. After nitrogen filling, sealed centrifugal tube on vapor-bathing constant temperature vibrator under  $60^\circ\text{C}$  with the speed of  $200 \text{ r min}^{-1}$ . After 24 hours of reaction, the solution was centrifuged for 10 min at 4500 rpm. The

precipitate was activated by successively with phosphate buffer (pH 5.0) and a mixture of methanol and acetic acid (9:1, v/v) for remove the template. The precipitate was dried at 45 °C in vacuum for overnight. The synthesis method of the starch silica surface non-molecular imprinted polymers (NIPs-AMPS) was the same as that of MIPs-AMPS but the template molecule was not added.

**Table S1.** Numerical value of two diffusion coefficients

| $T_{1/2}$ (s) | $D_p$ (cm <sup>2</sup> /s) | $D_f$ (cm <sup>2</sup> /s) |
|---------------|----------------------------|----------------------------|
| 150           | $9.25 \times 10^{-14}$     | $1.09 \times 10^{-12}$     |
| 300           | $4.62 \times 10^{-14}$     | $5.47 \times 10^{-13}$     |
| 450           | $3.08 \times 10^{-14}$     | $3.65 \times 10^{-13}$     |
| 600           | $2.31 \times 10^{-14}$     | $2.73 \times 10^{-13}$     |
| 900           | $1.54 \times 10^{-14}$     | $1.82 \times 10^{-13}$     |
| 1200          | $1.16 \times 10^{-14}$     | $1.37 \times 10^{-13}$     |
| 1800          | $7.70 \times 10^{-15}$     | $9.12 \times 10^{-14}$     |
| 2400          | $5.78 \times 10^{-15}$     | $6.84 \times 10^{-14}$     |
| 3600          | $3.85 \times 10^{-15}$     | $4.56 \times 10^{-14}$     |
| 4500          | $3.08 \times 10^{-15}$     | $3.65 \times 10^{-14}$     |
| 5400          | $2.57 \times 10^{-15}$     | $3.04 \times 10^{-14}$     |

**Table S2.** Distribution coefficient and selectivity coefficient data for MIPs and NIPs

| Tested<br>compounds | MIPs                        |                            |       | NIPs                        |                            |       | $k'$  |
|---------------------|-----------------------------|----------------------------|-------|-----------------------------|----------------------------|-------|-------|
|                     | $C_e$ (mg L <sup>-1</sup> ) | $K_d$ (L g <sup>-1</sup> ) | $k$   | $C_e$ (mg L <sup>-1</sup> ) | $K_d$ (L g <sup>-1</sup> ) | $k$   |       |
|                     | 1)                          |                            |       |                             |                            |       |       |
| starch              | 16.15                       | 0.810                      | -     | 20.47                       | 0.288                      | -     | -     |
| G70000              | 21.86                       | 0.163                      | 4.959 | 22.70                       | 0.095                      | 3.027 | 1.638 |
| G10000              | 20.54                       | 0.281                      | 2.883 | 21.64                       | 0.182                      | 1.586 | 1.818 |
| G5000               | 22.21                       | 0.134                      | 6.037 | 22.79                       | 0.0886                     | 3.249 | 1.858 |

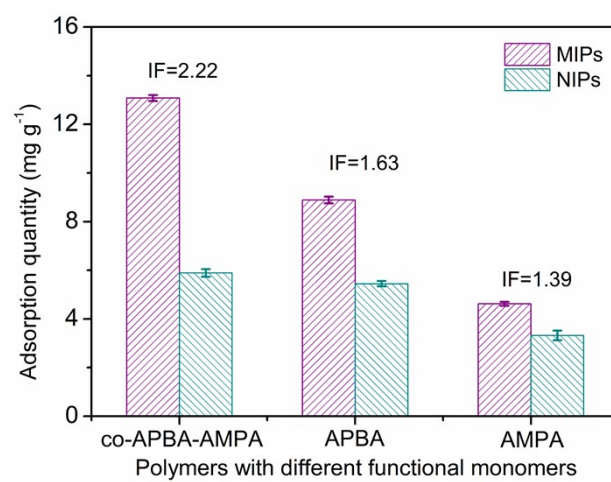

**Fig. S1** The adsorption capacity and imprinting factor of dual functional monomer MIPs and mono-functional monomer MIPs.

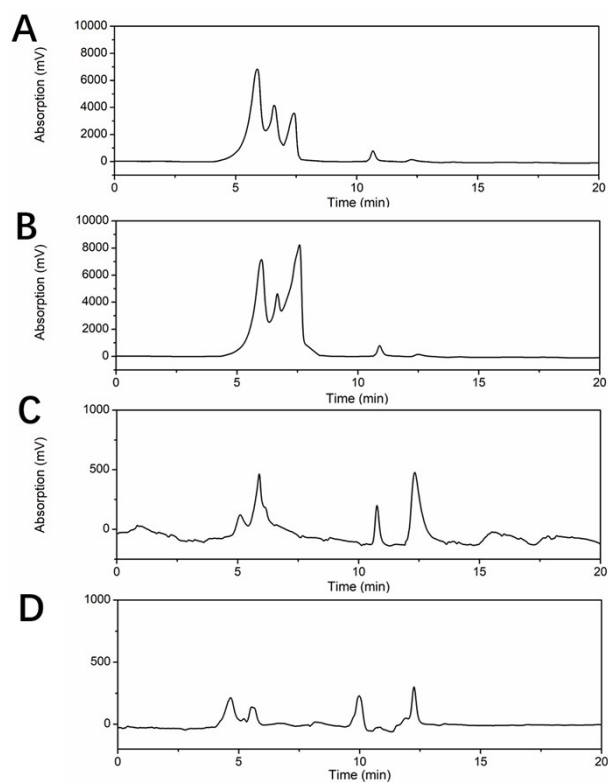

1

**Fig. S2** The HPLC chromatograms of the eluent by solid phase extraction columns. DEAE-52 (A), Sephadex-100 (B), silica gel (C), ODS (D).

1. B. Zijun, C. Yang, Y. Jin, W. Shuangshou and L. Zhen, *Angewandte Chemie*, 2015, **54**, 10211-10215.
